# Supplementary material for: Astrocytic stress response is induced by exposure to astrocyte-binding antibodies expressed by plasmablasts from pediatric patients with acute transverse myelitis
Source: PubMed Central journal article supplement (PMC11197286; doi:10.1186/s12974-024-03127-2), 2024-06-24

# Supplementary Figure S1: CyTOF gating strategy.

## Panel A. Cytof manual gates that outline B cell subsets in Panels D-G

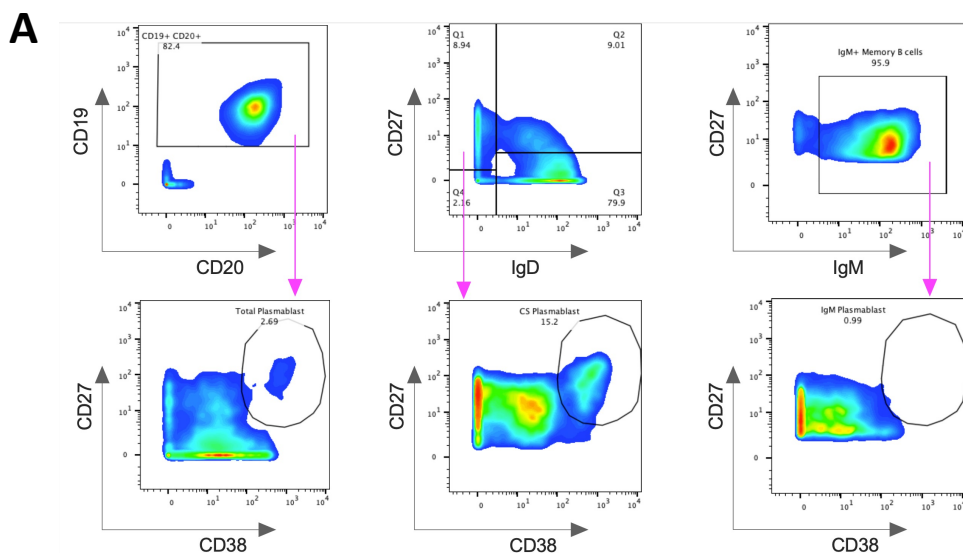

## Panel B. CYTOF manual gates that outline B cell subsets in Panels H|I

**B**

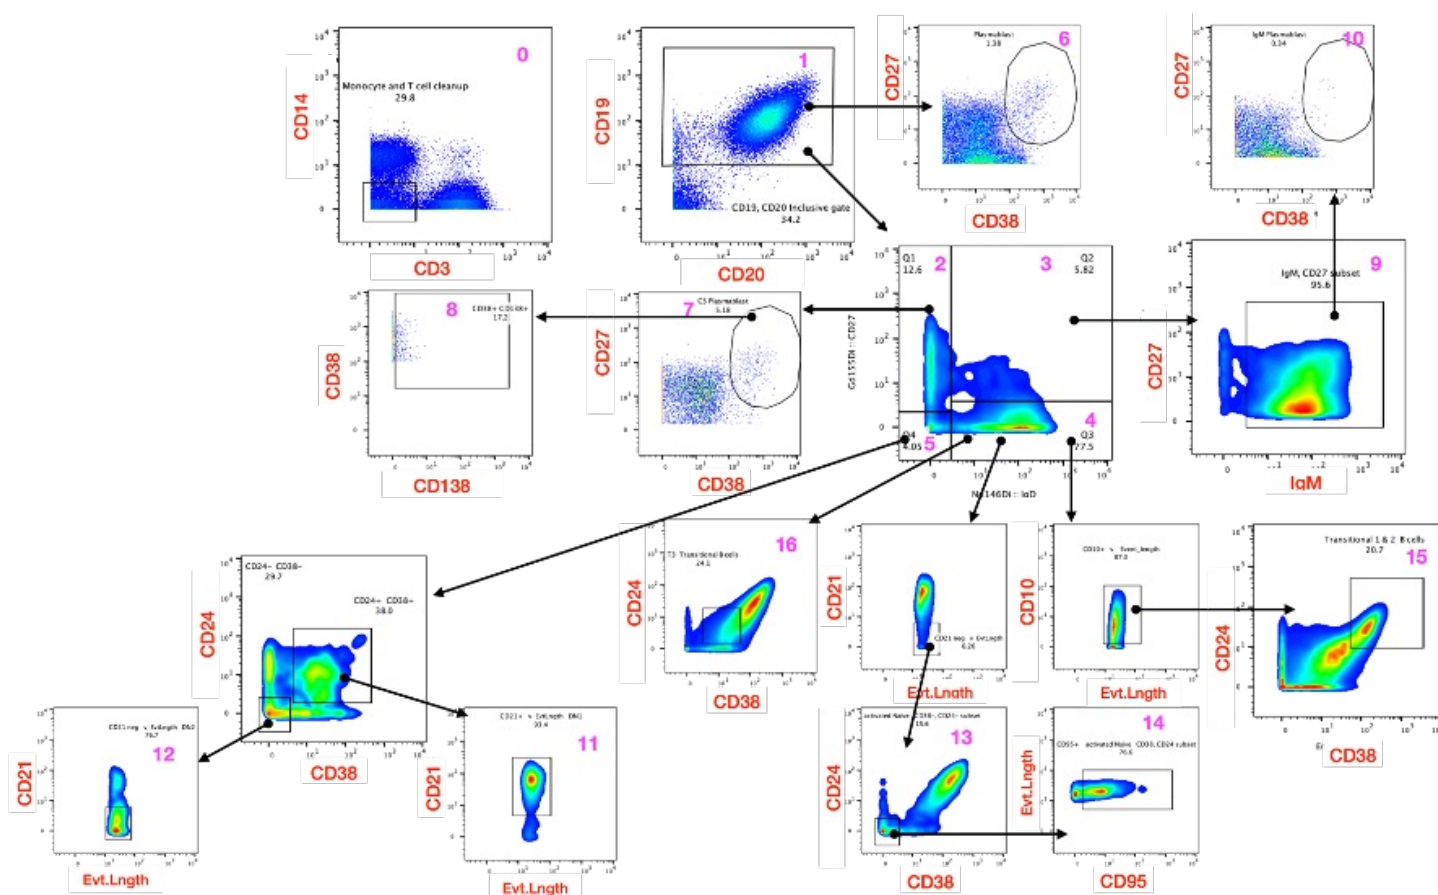

# Supplementary Figure S2 – Wild-type and EAE mouse spinal cord reactivity of serum IgG by immunofluorescence.

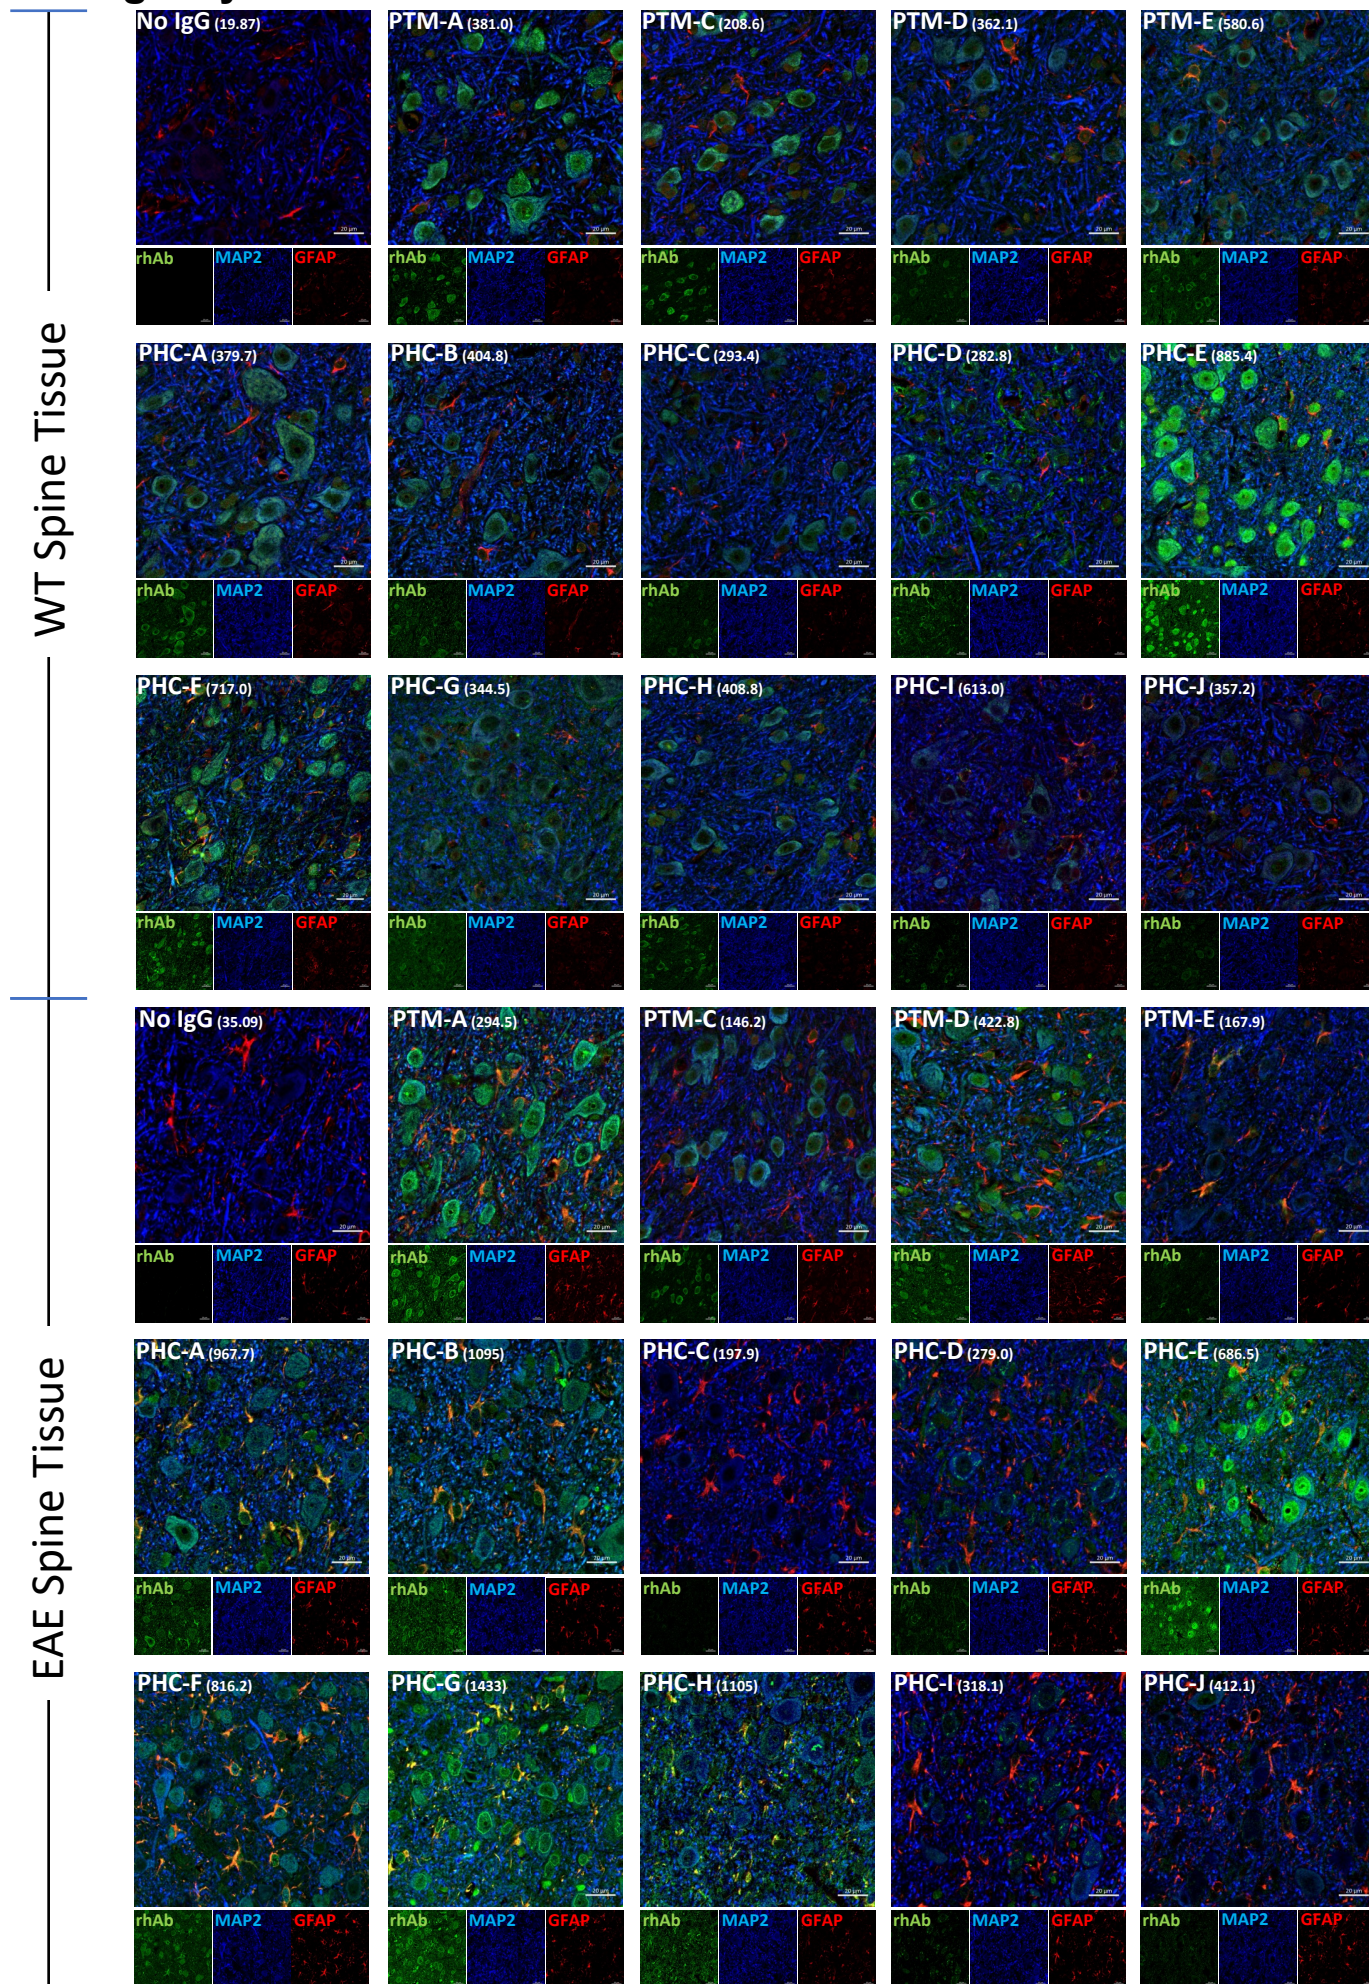



# Supplemental Figure S4: EAE mouse spinal cord reactivity of rhAbs by immunofluorescence.

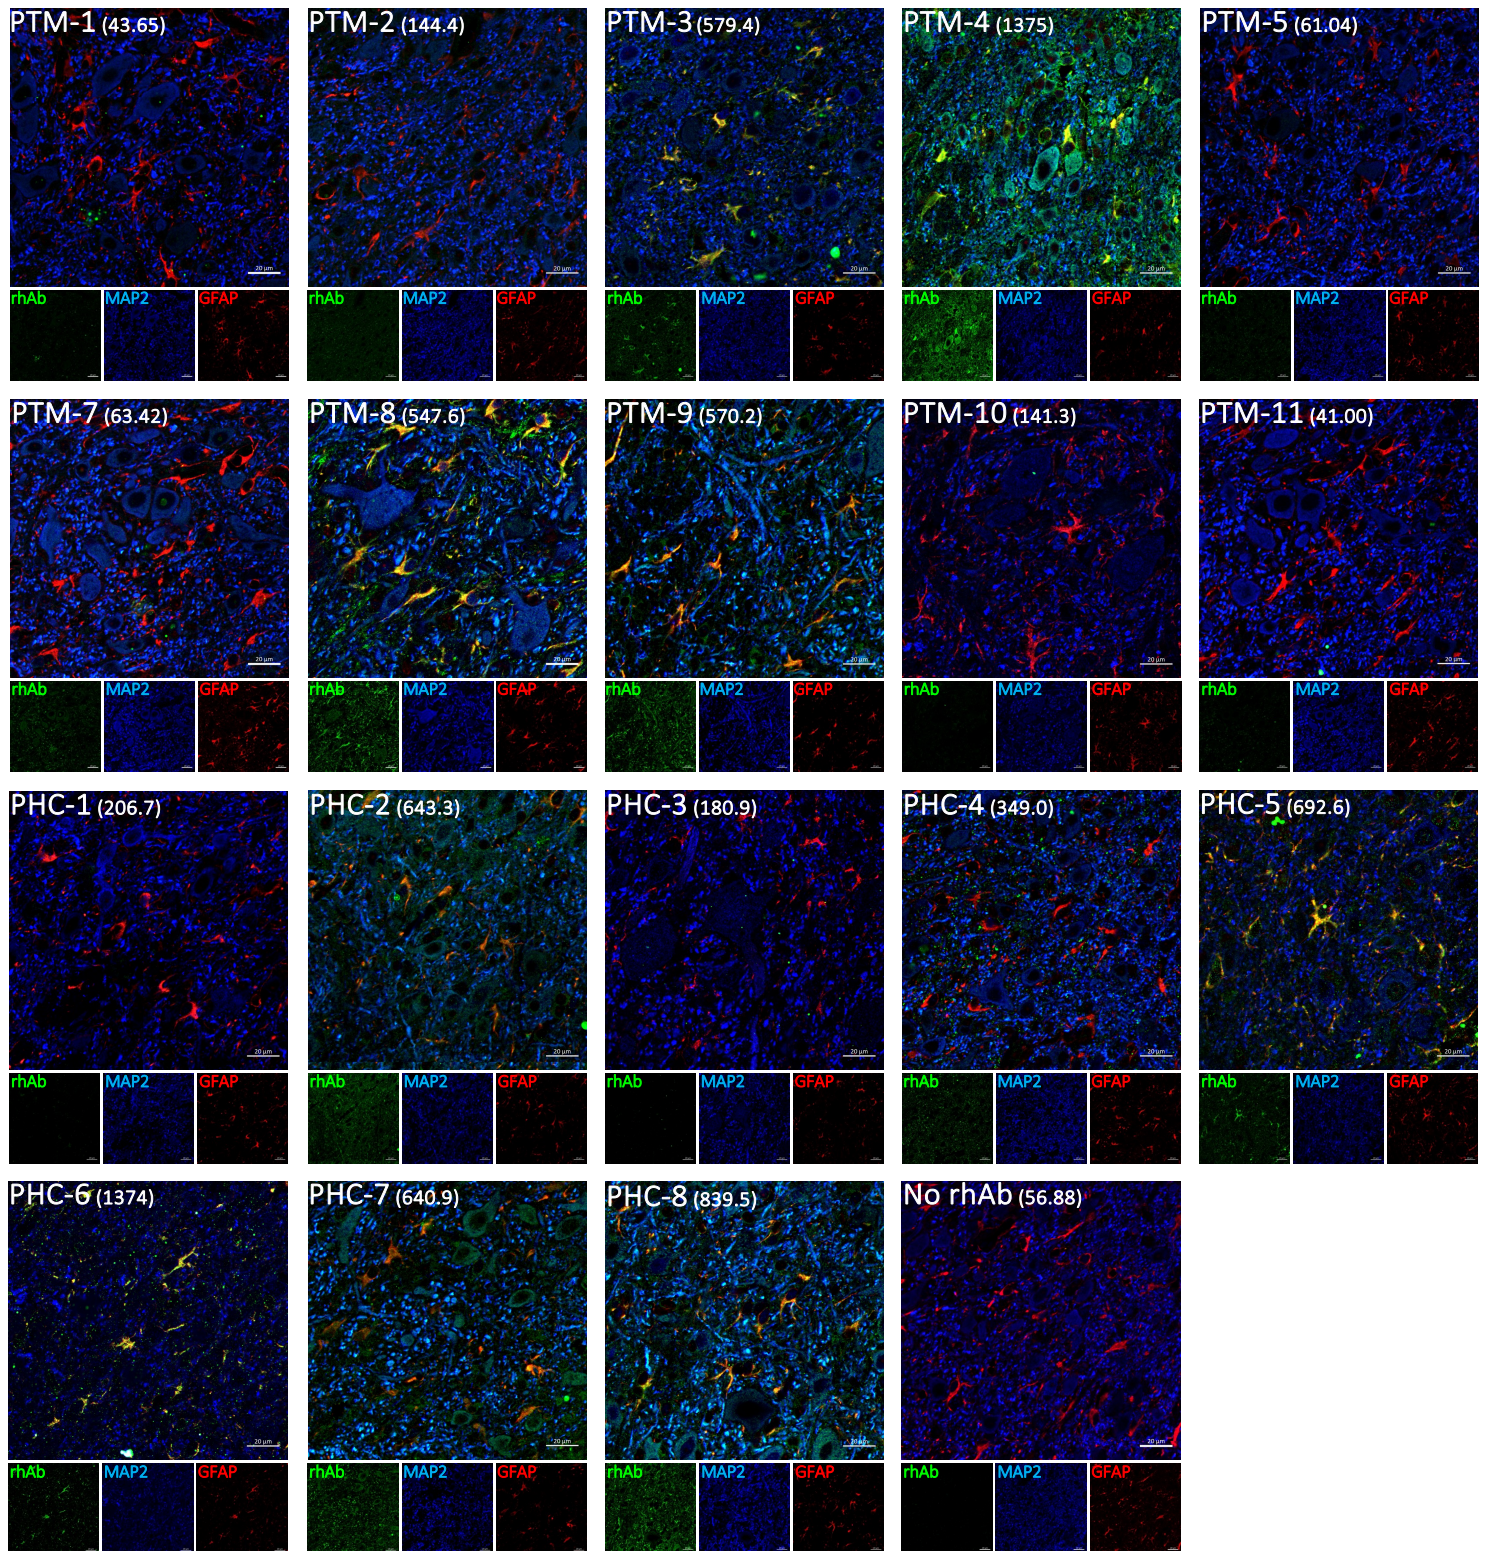

# Supplemental Figure S5: Wild-type mouse brain reactivity of rhAbs by immunofluorescence.

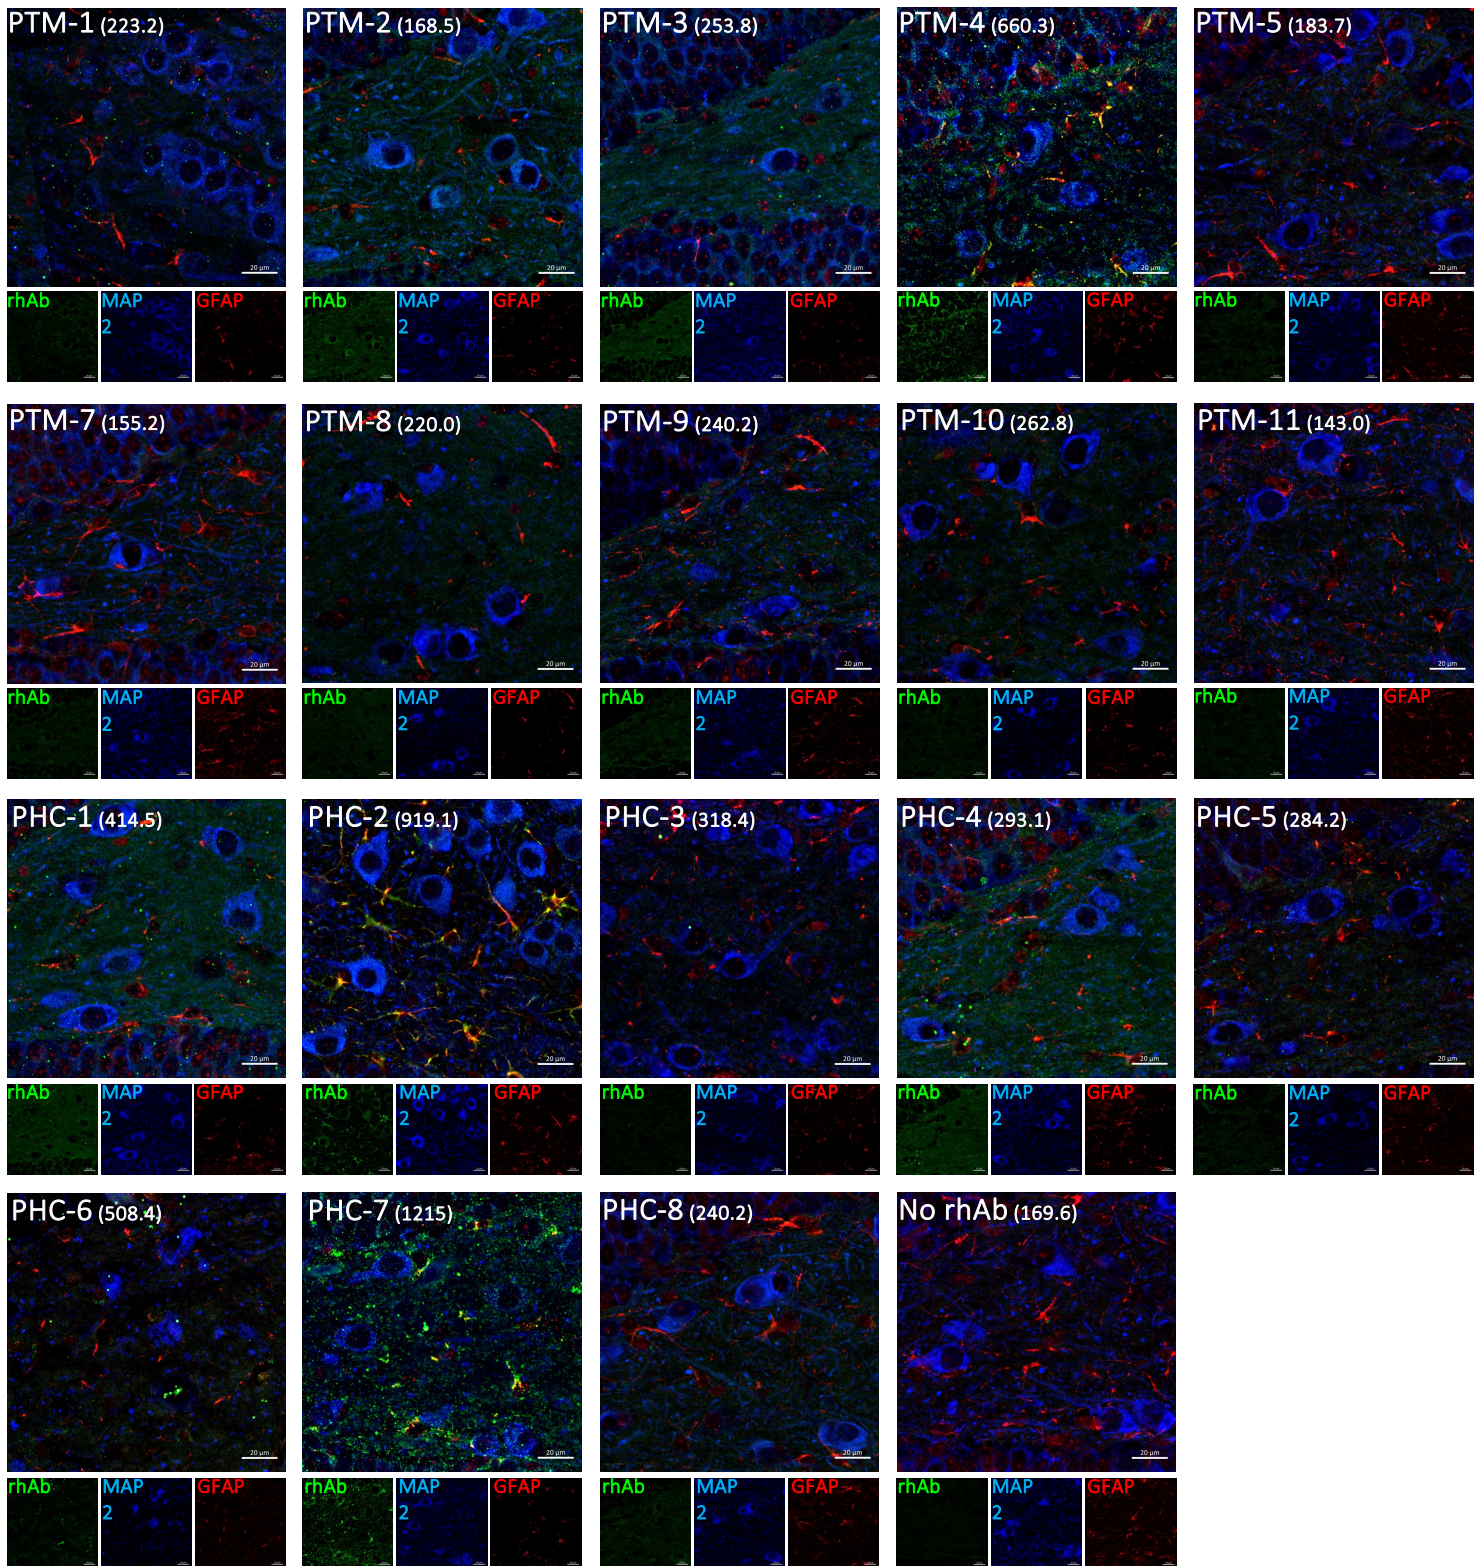

# Supplemental Figure S6: EAE mouse brain reactivity of rhAbs by immunofluorescence

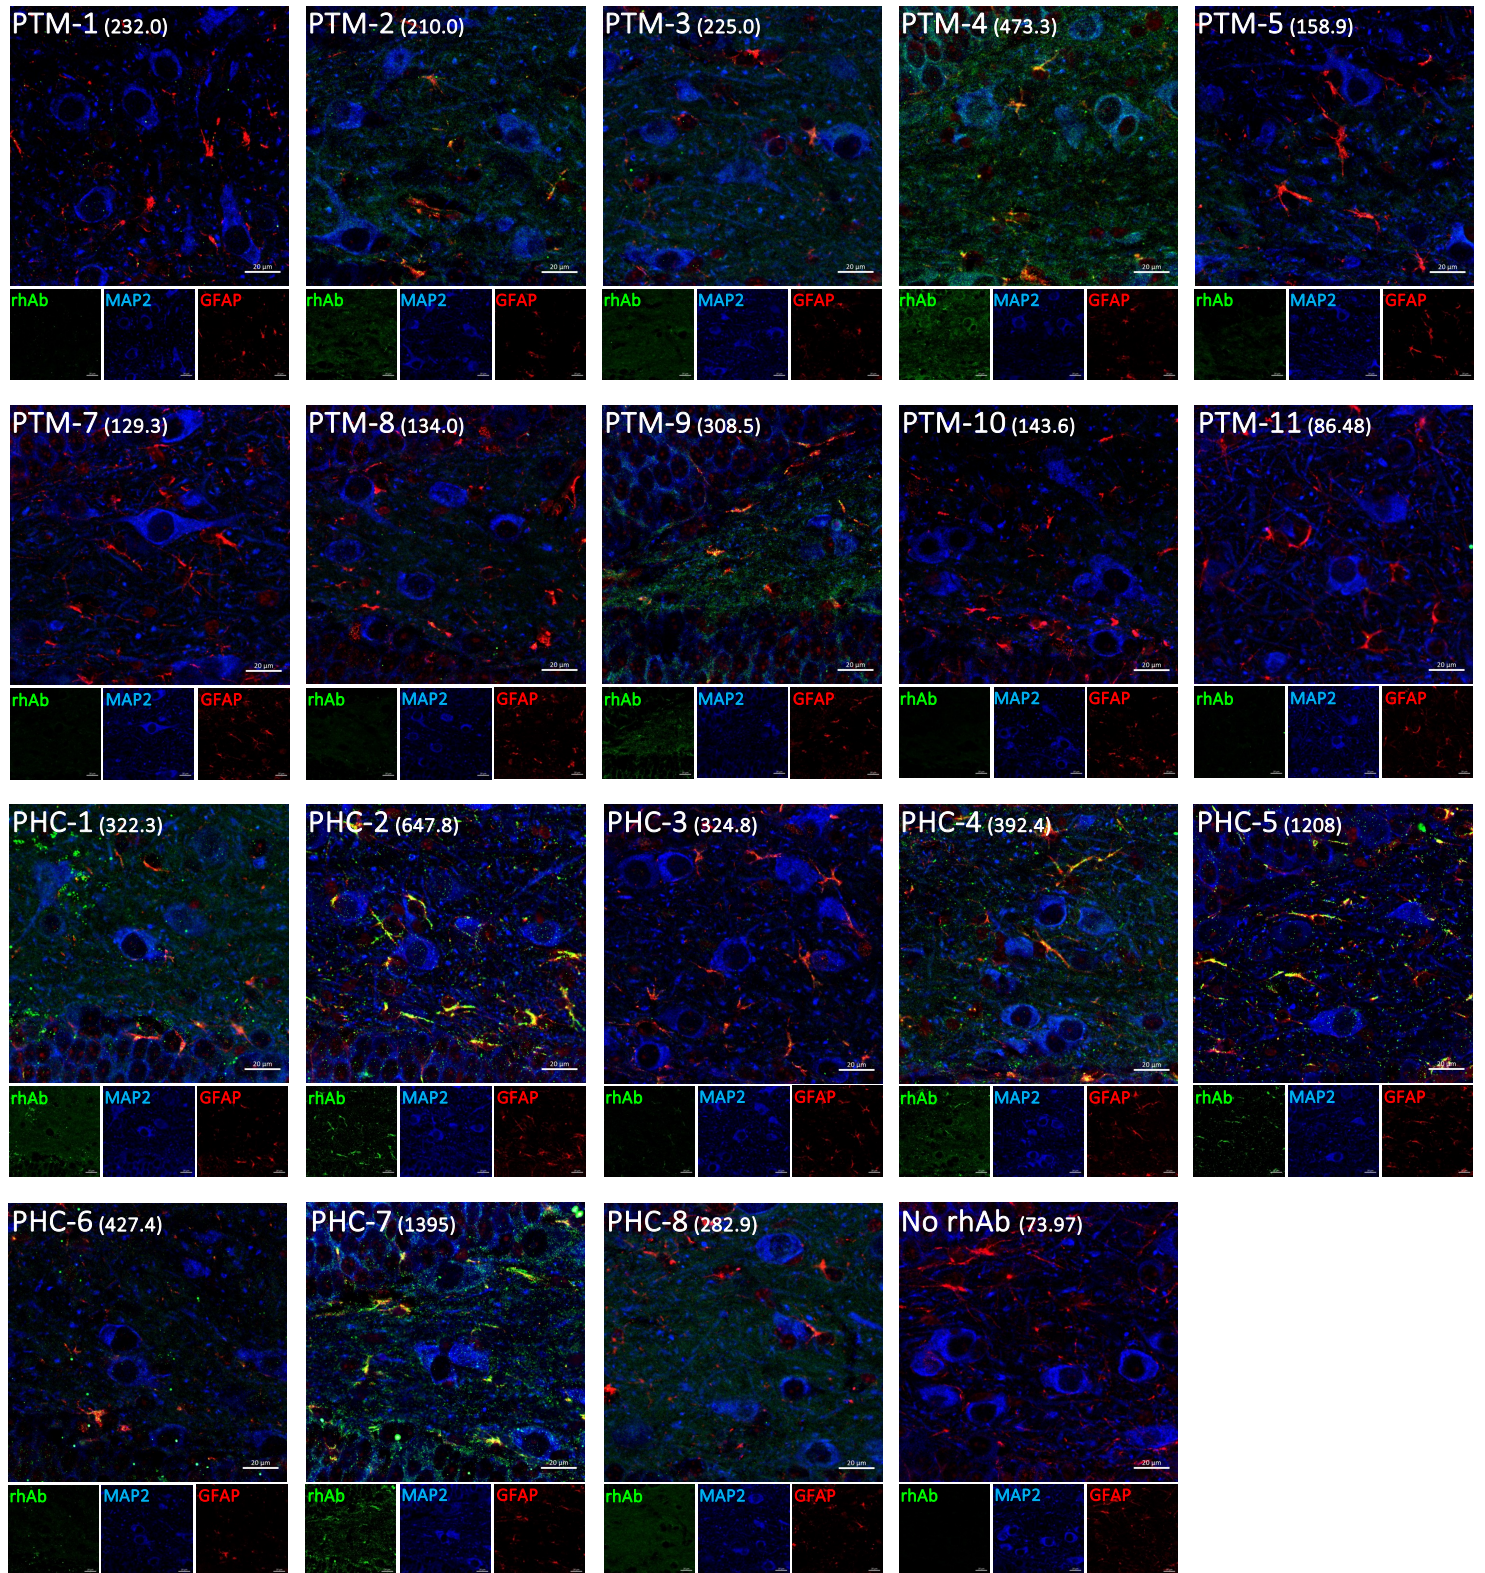

# Supplemental Figure S7: Primary human astrocyte reactivity of rhAbs by ICC

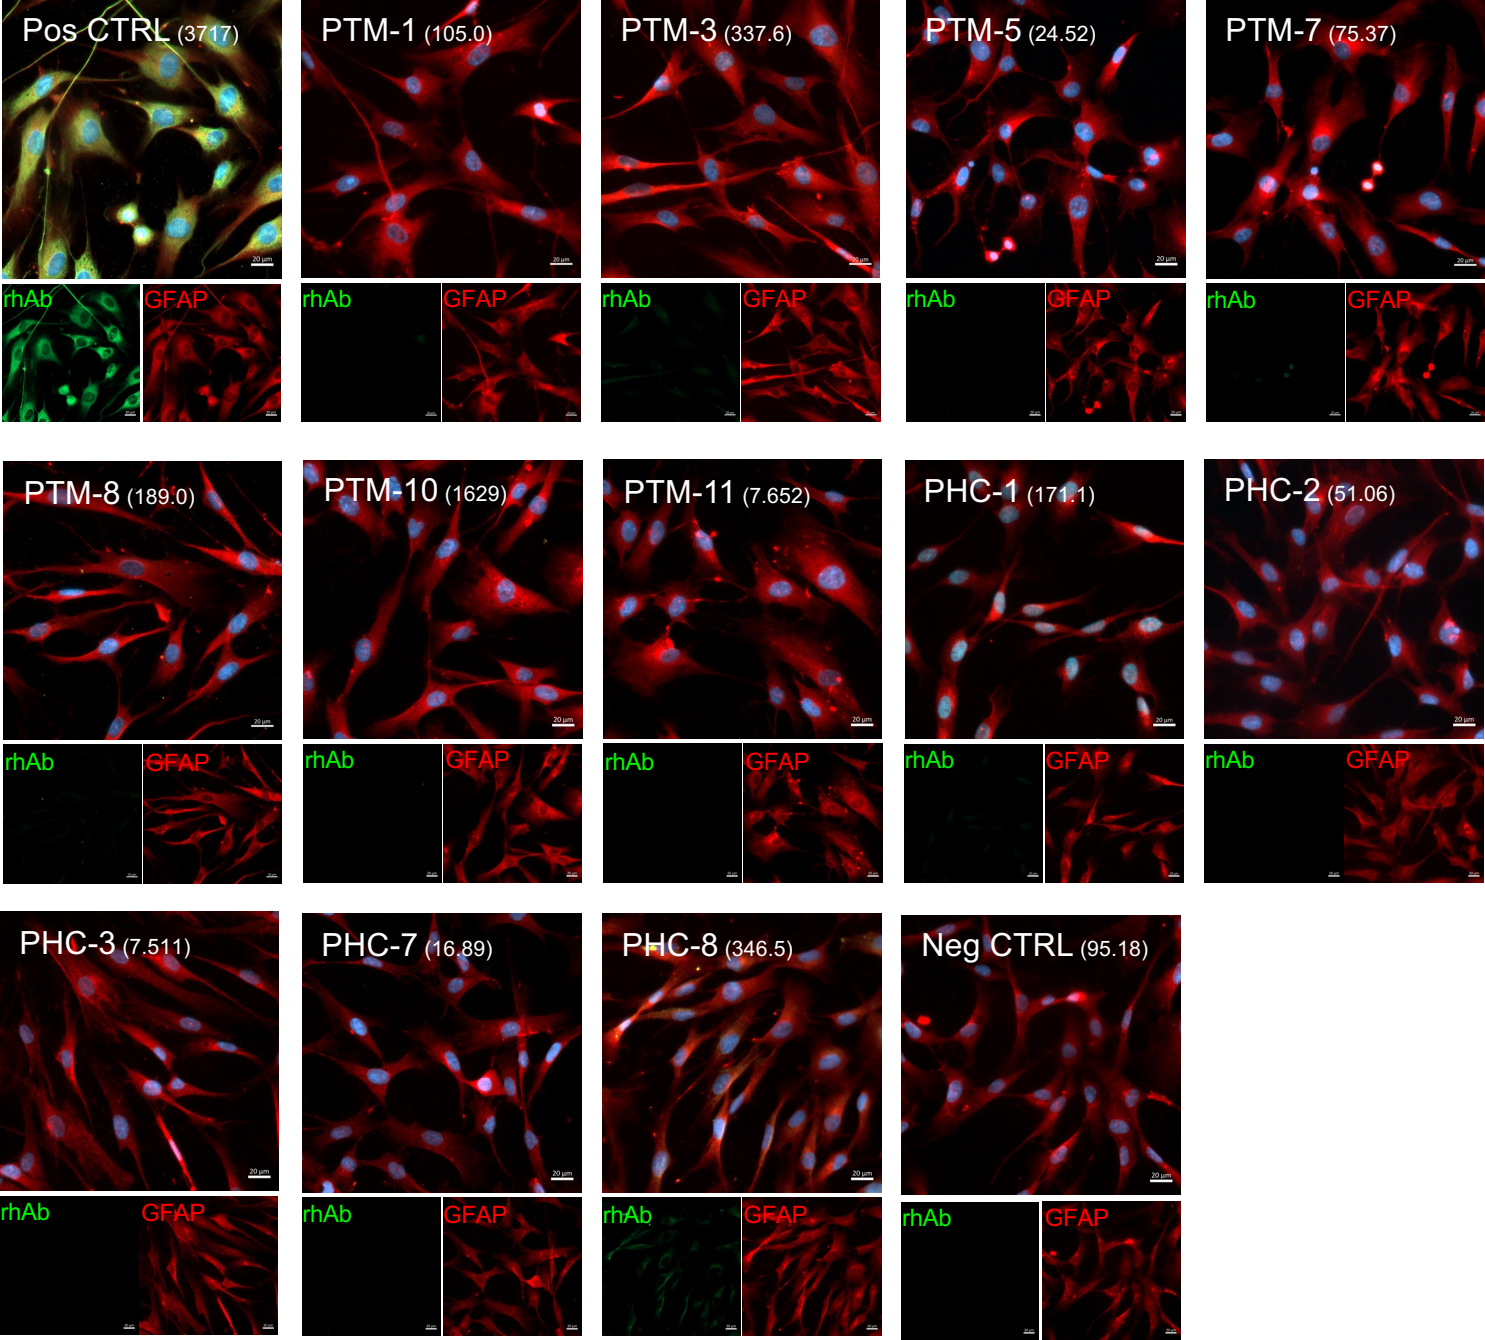

# Supplemental Figure S8: Hep2 reactivity of rhAbs by cell-based assay.

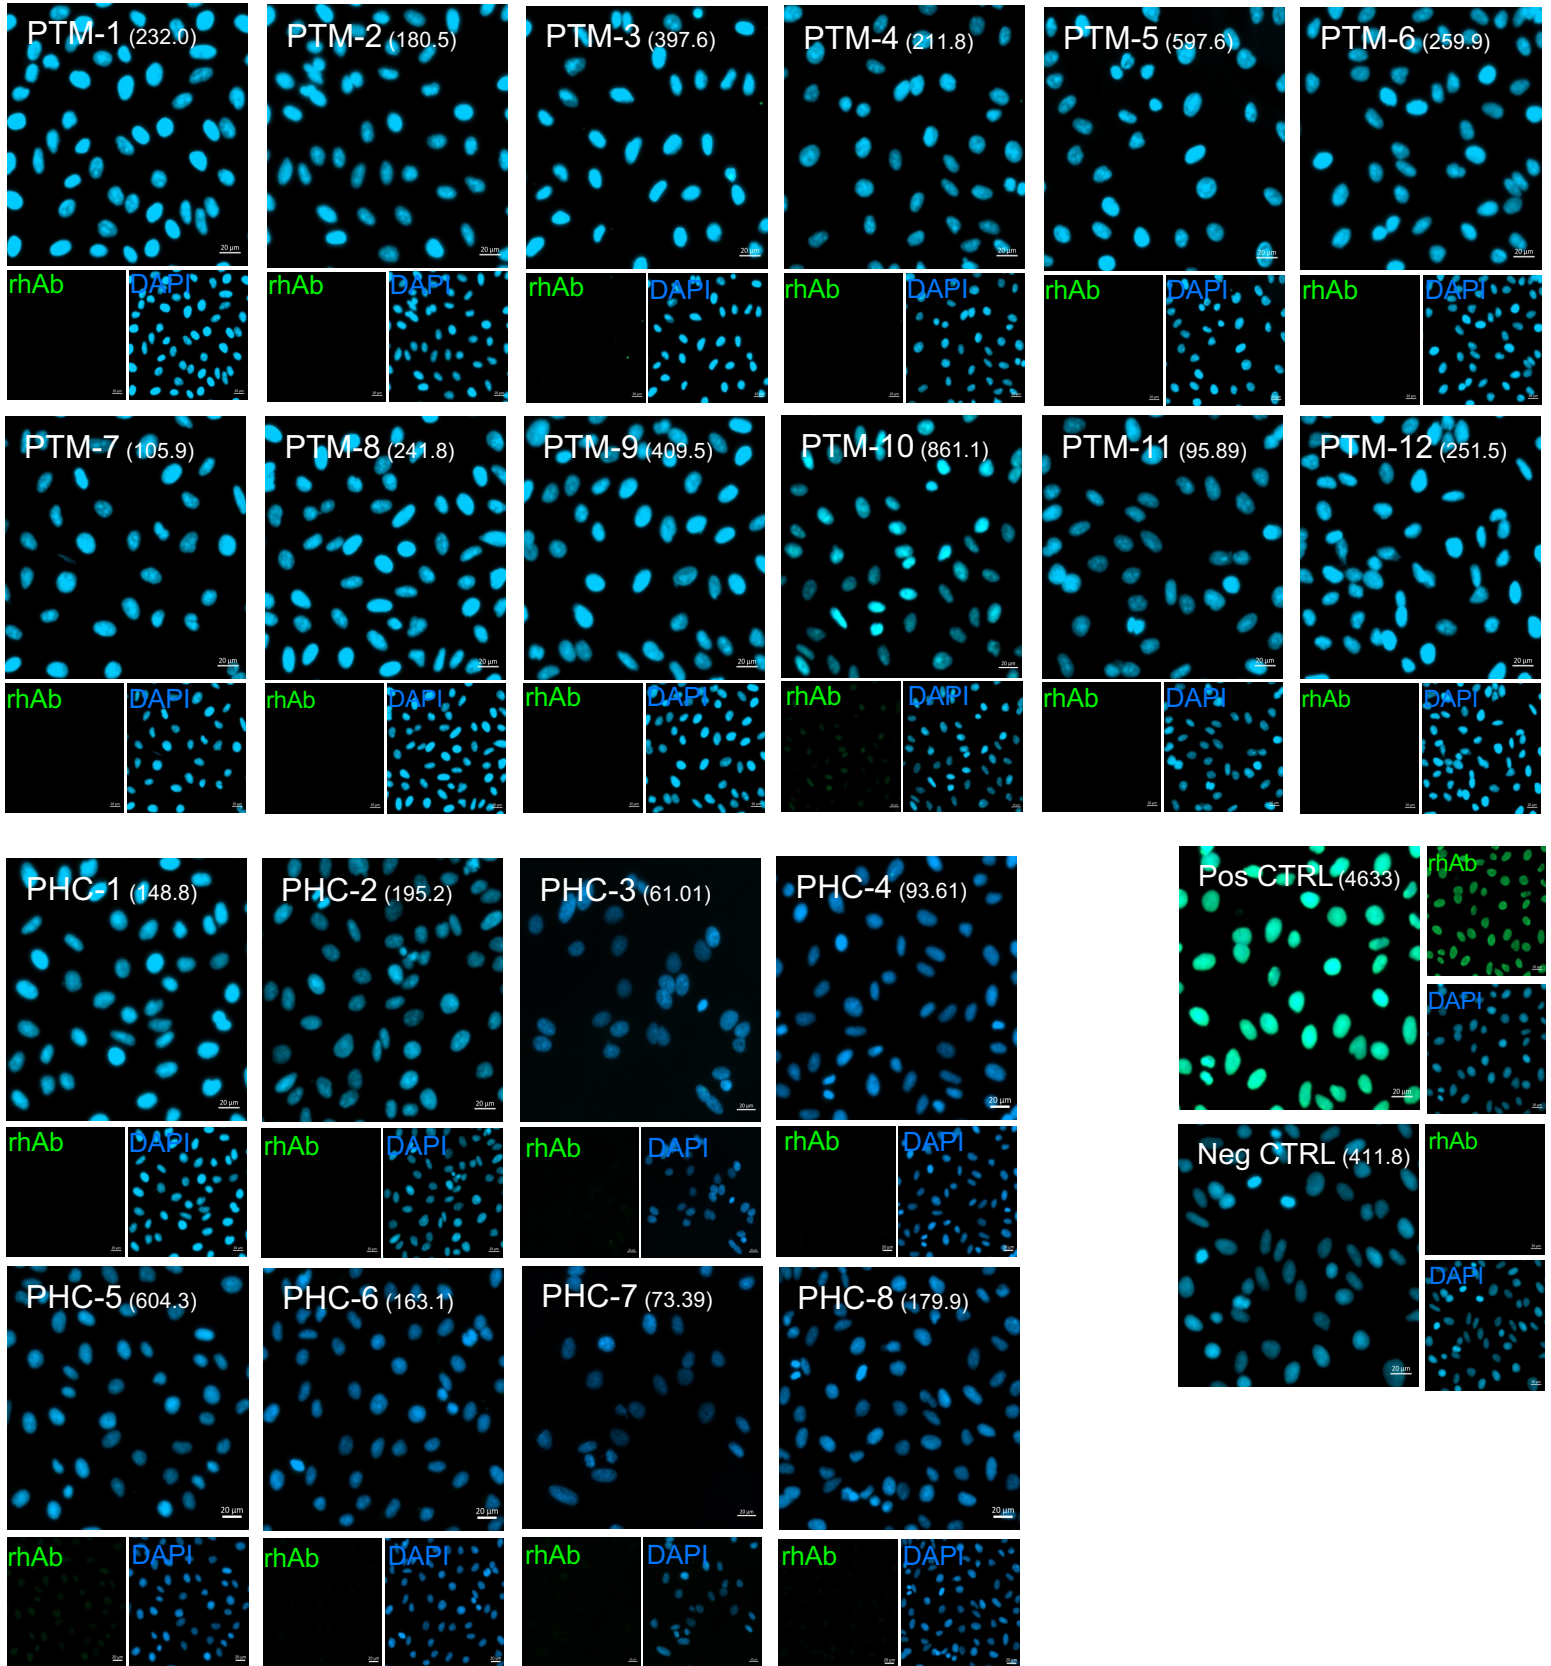



# Supplemental Figure S9: Reactivity of rhAbs to HEK293 cells expressing AQP4.

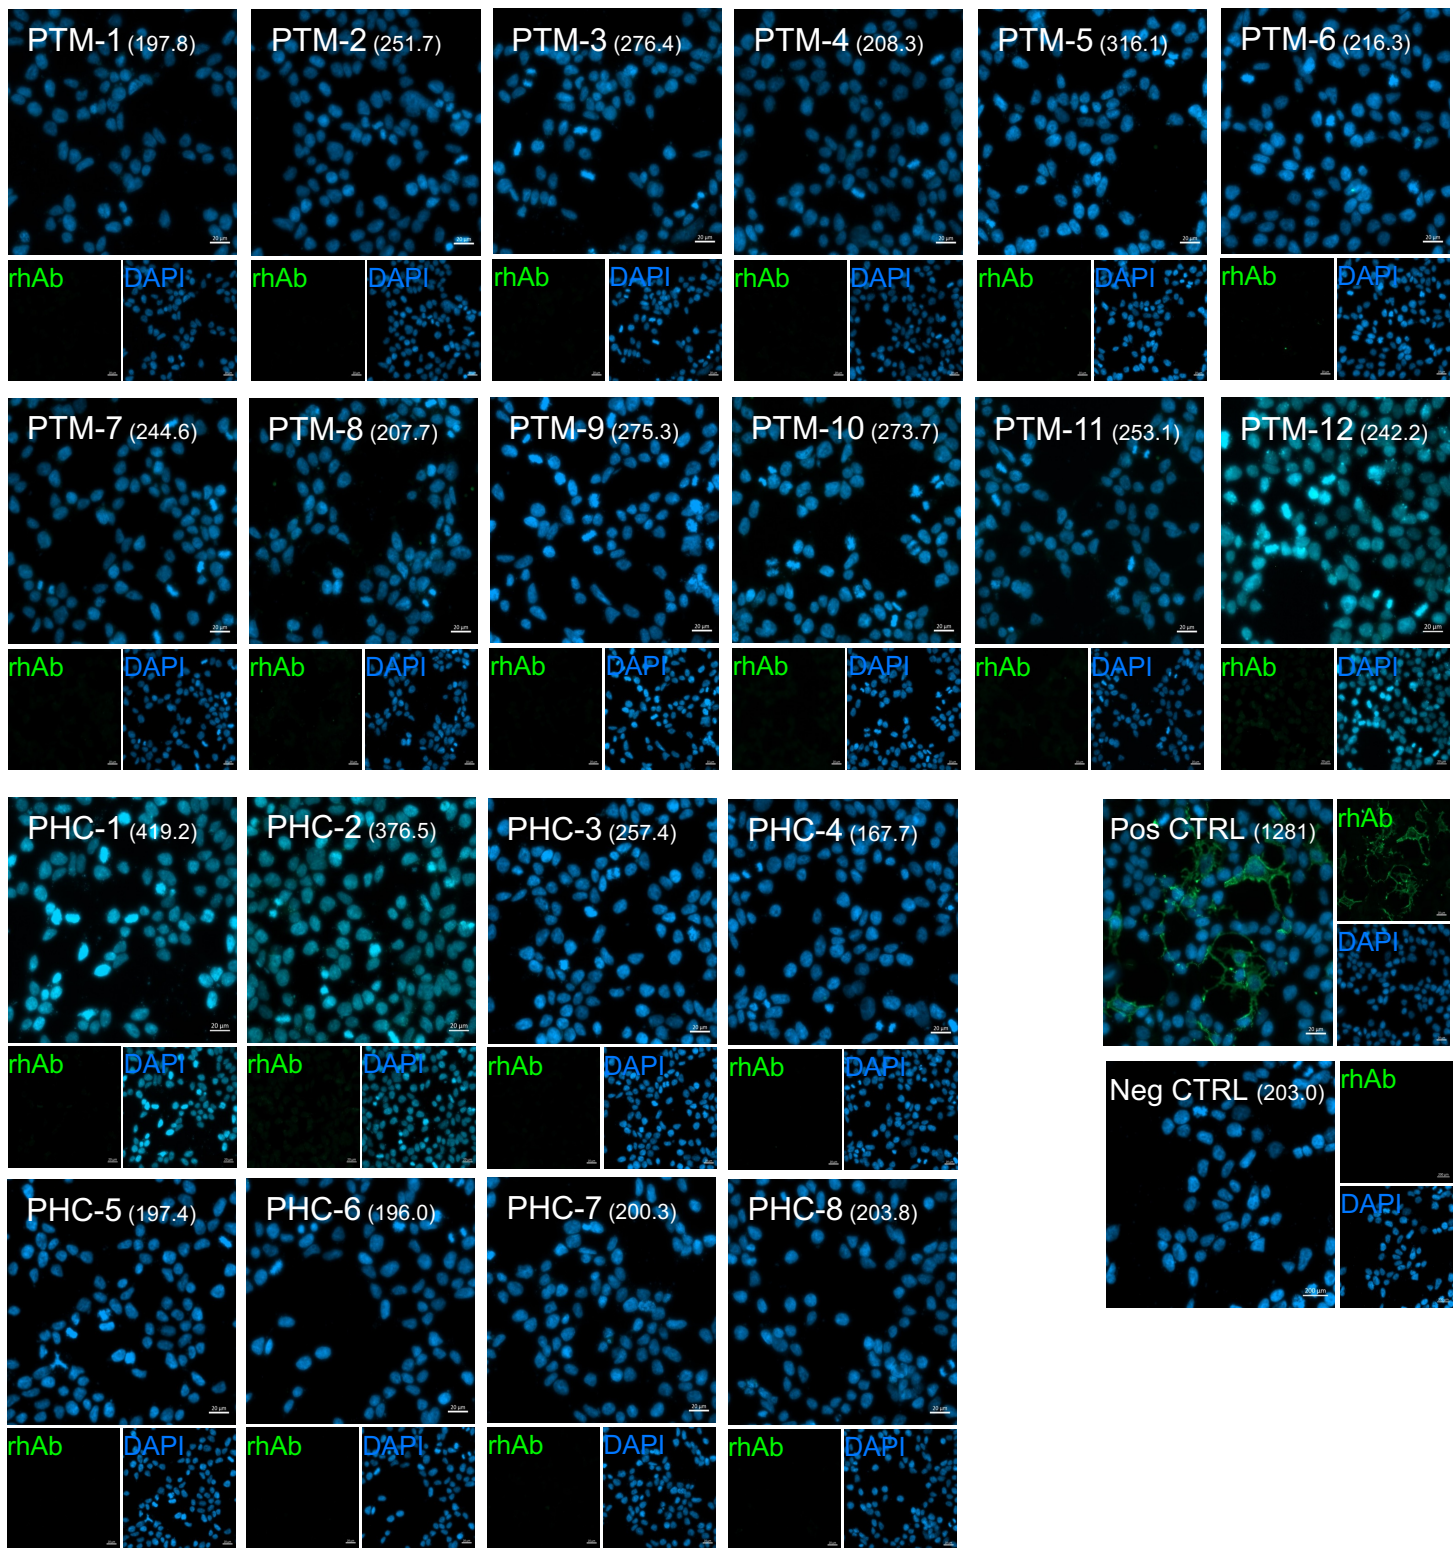

# Supplementary Figure S10: rhAbs are internalized to live primary human astrocytes

**A**

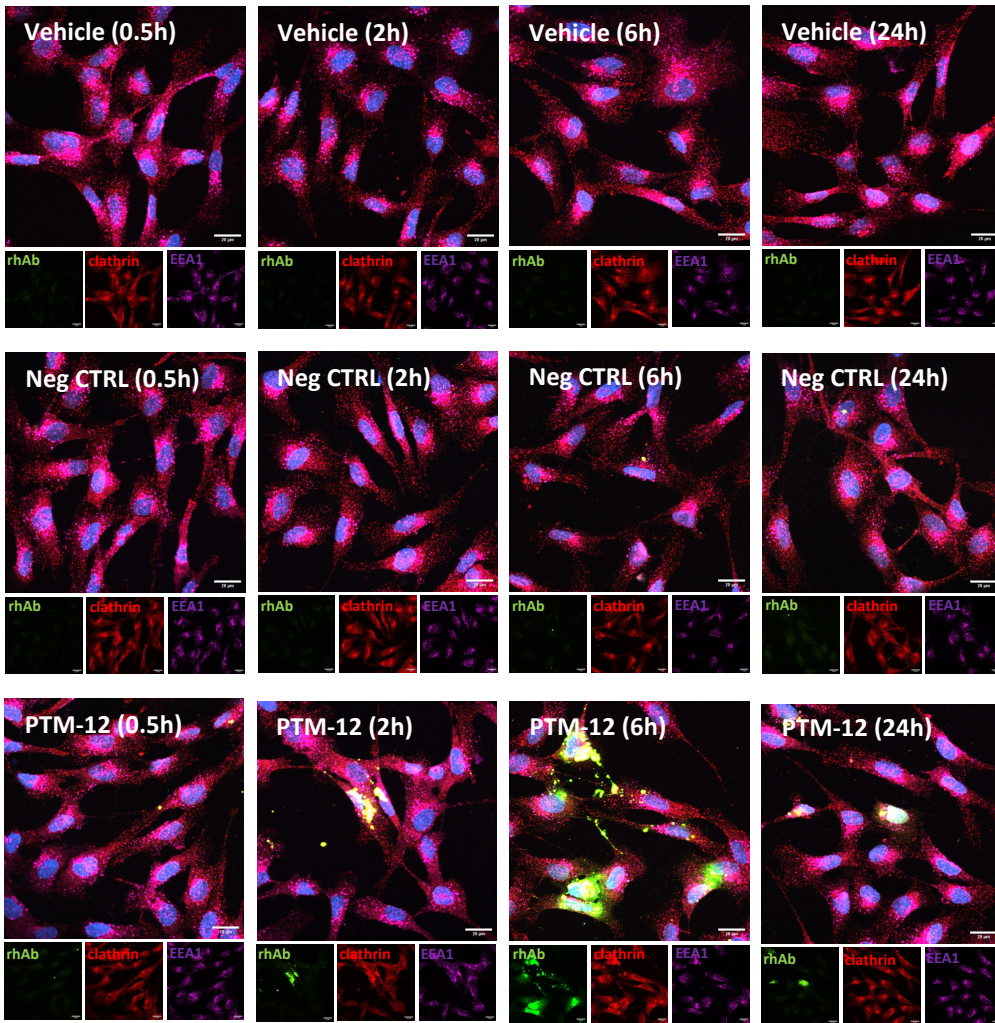

**B**

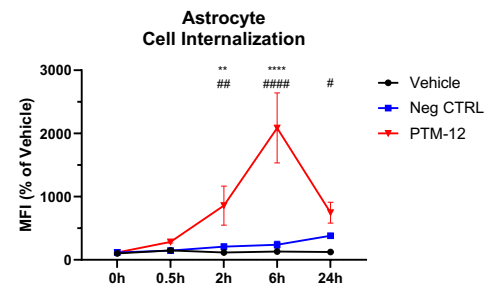

Supplement: 12974_2024_3127_MOESM1_ESM.pdf [file 12974_2024_3127_MOESM1_ESM.pdf]
